adjunct in the cardiovascular laboratory during cardiac catheterizations, and a means of monitoring patients in the operating room, recovery room, and intensive care unit.

Acknowledgment is made to Dr. Homer Warner, Professor and Chairman of the University of Utah Department of Biophysics and Bioengineering, for his advice and help in preparing this manuscript.

### References

1. Warner, H. R.: Use of analogue computers in the study of control mechanisms in the circulation, *Fed. Proc.* 21: 87, 1962.
2. Spencer, W. A., and Vallbona, C.: Application of computers in clinical practice, *J.A.M.A.* 191: 917, 1965.
3. Wilber, S. A., and Derrick, W. S.: Patient monitoring and anesthetic management, *J.A.M.A.* 191: 893, 1965.
4. Weil, M. H., Shubin, H., and Rand, W.: Experience with a digital computer for study and improved management of the critically ill, *J.A.M.A.* 198: 1011, 1966.
5. Guyton, A. C.: *Circulatory Physiology: Cardiac Output and Its Regulation*. Philadelphia, W. B. Saunders Co., 1963, pp. 28-30.
6. Fryor, T. A., and Warner, H. R.: Time-sharing in biomedical research, *Datamation* 12: 55, 1966.
7. Bazett, H. C., Cotton, F. S., Laplace, L. B., and Scott, J. C.: The calculation of cardiac output and effective peripheral resistance from blood pressure measurements, with an appendix on the size of the aorta in man, *Amer. J. Physiol.* 113: 312, 1935.
8. Jones, W. B., Hefner, L. L., Bancroft, W. H., Jr., and Klip, W.: Velocity of blood flow and stroke volume obtained from the pressure pulse, *J. Clin. Invest.* 38: 2087, 1959.
9. Jones, W. B., and Griffin, J. B.: Comparison of computed aortic blood velocity with that of electromagnetic flowmeter, *J. Appl. Physiol.* 17: 482, 1962.
10. Jones, W. B., Russell, R. O., Jr., and Dalton, D. H., Jr.: An evaluation of computed stroke volume in man, *Amer. Heart J.* 72: 748, 1966.
11. Hamilton, W. F., and Remington, J. W.: The measurement of the stroke volume from the pressure pulse, *Amer. J. Physiol.* 148: 14, 1947.
12. Remington, J. W., Noback, C. R., Hamilton, W. F., and Cold, J. J.: Volume elasticity characteristics of the human aorta and prediction of the stroke volume from the pressure pulse, *Amer. J. Physiol.* 153: 298, 1948.
13. Hamilton, W. F.: Measurement of cardiac output. In Hamilton, W. F., editor: *Handbook of Physiology*, Sect. 2: Circulation, Vol. 1. Washington, D. C., American Physiological Society, 1962, pp. 555-562.
14. Warner, H. R., Swan, H. J. C., Connolly, D. C., Tompkins, R. G., and Wood, E. H.: Quantitation of beat-to-beat changes in stroke volume from the aortic pulse contour in man, *J. Appl. Physiol.* 5: 495, 1953.
15. Warner, H. R.: The role of computers in medical research, *J.A.M.A.* 196: 944, 1966.
16. Warner, H. R., Gardner, R. M., and Toronto, A. F.: Computer based monitoring of cardiovascular functions in postoperative patients, *Circulation (Suppl.)*: to be published April 1968.

### Surgery

**TRANSURETHRAL RESECTION** Three serious complications are avoidable and, at the present time, can be attributed to carelessness. Intravascular hemolysis can be prevented by use of an isotonic nonelectrolytic solution for irrigation. Hypervolemia and hyponatremia can be reduced by avoidance of overdistention of the bladder, use of arterial hypotension, and administration of mannitol. Intravesical explosion will not occur if all accumulated hydrogen and oxygen are released from the bladder frequently. (Creedy, C. D.: *Reactions Peculiar to Transurethral Resection of the Prostate*, *Surg. Clin. N. Amer.* 47: 1471 (Dec.) 1967.)
